# Supplementary material for: Evaluation of the Use of Antibiofilmogram Technology in the Clinical Evolution of Foot Ulcers Infected by Staphylococcus aureus in Persons Living with Diabetes: A Pilot Study
Source: MDPI journal article supplement (doi:10.3390/jcm10245928), 2021-12-17
Supplement: s1 [file s1]

**Table S1.** Comparison of MLST results of the *S. aureus* strains isolated from DFI at inclusion, at the end of the treatment and at the end of the study.

| Patient           | <i>S. aureus</i> ST: |                             |                         |
|-------------------|----------------------|-----------------------------|-------------------------|
|                   | At Inclusion         | At the End of Treatment D15 | At the End of Study D45 |
| C01P001 (Case)    | ST45                 | ST45                        | -                       |
| C01P002 (Case)    | ST97                 |                             | ST97                    |
| C01P010 (Case)    | ST30                 |                             | ST30                    |
| C01P011 (Case)    | ST97                 | ST97                        |                         |
| C01P013 (Case)    | ST59                 |                             | ST59                    |
| C03P002 (Case)    | ST2199               | ST2199                      | -                       |
| C03P008 (Control) | ST30                 | ST30                        | ST30                    |
| C03P010 (Control) | ST5                  |                             | ST5                     |
| C04P002 (Control) | ST149                |                             | ST149                   |
| C04P004 (Control) | ST30                 | ST30                        | ST30                    |
| C04P005 (Control) | ST45                 | ST45                        | ST398                   |
| C06P001 (Control) | ST15                 | ST15                        |                         |
| C06P003 (Case)    | ST398                |                             | ST2434                  |
